# Supplementary material for: 3D mesh processing using GAMer 2 to enable reaction-diffusion simulations in realistic cellular geometries
Source: PubMed Central journal article supplement (PMC7162555; doi:10.1371/journal.pcbi.1007756), 2020-04-06
Supplement: pcbi.1007756.s002.pdf [file pcbi.1007756.s002.pdf]

# 3D Mesh processing using GAMer 2 to enable reaction-diffusion simulations in realistic cellular geometries

Christopher T. Lee, Justin G. Laughlin, Nils Angliviél de La Beaumelle, Rommie E. Amaro, J. Andrew McCammon, Ravi Ramamoorthi, Michael Holst, and Padmini Rangamani

**Table S2.** Local geometry associated with signs of principal curvatures according to our sign convention.

|                | $\kappa_1 > 0$    | $\kappa_1 = 0$   | $\kappa_1 < 0$   |
|----------------|-------------------|------------------|------------------|
| $\kappa_2 > 0$ | Concave ellipsoid | Concave cylinder | Hyperboloid      |
| $\kappa_2 = 0$ | Concave cylinder  | Plane            | Convex cylinder  |
| $\kappa_2 < 0$ | Hyperboloid       | Convex cylinder  | Convex ellipsoid |
